# Supplementary material
Source: publisher figshare collection journal article supplement (https://tandf.figshare.com/ndownloader/files/14640917)
Supplement: Supplementary file 1 [file 14640917]

# **APPENDIX A:** States with.08 BAC Per Se Laws

| State | **Enactment Date** | **Effective Date** |
| --- | --- | --- |
| Alabama | 07/31/95 | 10/01/95 |
| Alaska | 07/03/01 | 09/01/01 |
| Arizona | 04/11/01 | 08/31/01 |
| Arkansas | 03/06/01 | 08/13/01 |
| California | 1989 | 01/01/90 |
| Colorado | 05/21/04 | 07/01/04 |
| Connecticut | 07/01/02 | 07/01/02 |
| Delaware | 07/12/04 | 07/12/04 |
| District of Columbia | 12/01/98 | 04/13/99 |
| Florida | 04/27/93 | 01/01/94 |
| Georgia | 04/16/01 | 07/01/01 |
| Hawaii | 06/30/95 | 06/30/95 |
| Idaho | 03/17/97 | 07/01/97 |
| Illinois | 07/02/97 | 07/02/97 |
| Indiana | 05/09/01 | 07/01/01 |
| Iowa | 04/24/03 | 07/01/03 |
| Kansas | 04/22/93 | 07/01/93 |
| Kentucky | 04/21/00 | 10/01/00 |
| Louisiana | 06/26/01 | 09/30/03 |
| Maine | 04/28/88 | 08/04/88 |
| Maryland | 04/10/01 | 09/30/01 |
| Massachusetts | 07/01/03 | 07/01/03 |
| Michigan | 07/15/03 | 09/30/03 |
| Minnesota | 05/27/04 | 08/01/05 |
| Mississippi | 03/11/02 | 07/01/02 |
| Missouri | 06/12/01 | 09/29/01 |
| Montana | 04/15/03 | 04/15/03 |
| Nebraska | 03/01/01 | 09/01/01 |
| Nevada | 06/10/03 | 09/23/03 |
| New Hampshire | 04/15/93 | 01/01/94 |
| New Jersey | 01/20/04 | 01/20/04 |
| New Mexico | 03/19/93 | 01/01/94 |
| New York | 12/30/02 | 07/01/03 |
| North Carolina | 07/05/93 | 10/01/93 |
| North Dakota | 04/07/03 | 07/31/03 |
| Ohio | 03/30/03 | 07/01/03 |
| Oklahoma | 06/08/01 | 07/01/01 |
| Oregon | 08/04/83 | 10/15/83 |
| Pennsylvania | 09/30/03 | 09/30/03 |
| Puerto Rico | 01/10/00 | 01/10/01 |
| Rhode Island | 07/13/00 (compliant:07/02/03) | 07/13/00 (compliant:07/02/03) |
| South Carolina | 06/19/03 | 08/19/03 |
| South Dakota | 02/27/02 | 07/01/02 |
| Tennessee | 06/27/02 | 07/01/03 |
| Texas | 05/28/99 | 09/01/99 |
| Utah | 03/19/83 | 08/01/83 |
| Vermont | 06/06/91 | 07/01/91 |
| Virginia | 04/06/94 | 07/01/94 |
| Washington | 03/30/98 | 01/01/99 |
| West Virginia | 01/16/04 | 05/05/04 |
| Wisconsin | 07/03/03 | 09/30/03 |
| Wyoming | 03/11/02 | 07/01/02 |

Final
